# Supplementary material for: High-quality read-based phasing of cystic fibrosis cohort informs genetic understanding of disease modification
Source: PubMed Central journal article supplement — HGG Adv. 2022 Oct 20;4(1):100156. doi: 10.1016/j.xhgg.2022.100156 (PMC9647008; doi:10.1016/j.xhgg.2022.100156), 2022-10-20
Supplement: mmc1.pdf [file mmc1.pdf]

## **Supplemental information**

### **High-quality read-based phasing of cystic fibrosis cohort informs genetic understanding of disease modification**

**Scott Mastromatteo, Angela Chen, Jiafen Gong, Fan Lin, Bhooma Thiruvahindrapuram, Wilson W.L. Sung, Joe Whitney, Zhuozhi Wang, Rohan V. Patel, Katherine Keenan, Anat Halevy, Naim Panjwani, Julie Avolio, Cheng Wang, Guillaume Côté-Maurais, Stéphanie Bégin, Damien Adam, Emmanuelle Brochiero, Candice Bjornson, Mark Chilvers, April Price, Michael Parkins, Richard van Wylick, Dimas Mateos-Corral, Daniel Hughes, Mary Jane Smith, Nancy Morrison, Elizabeth Tullis, Anne L. Stephenson, Pearce Wilcox, Bradley S. Quon, Winnie M. Leung, Melinda Solomon, Lei Sun, Felix Ratjen, and Lisa J. Strug**

## Supplementary Figures

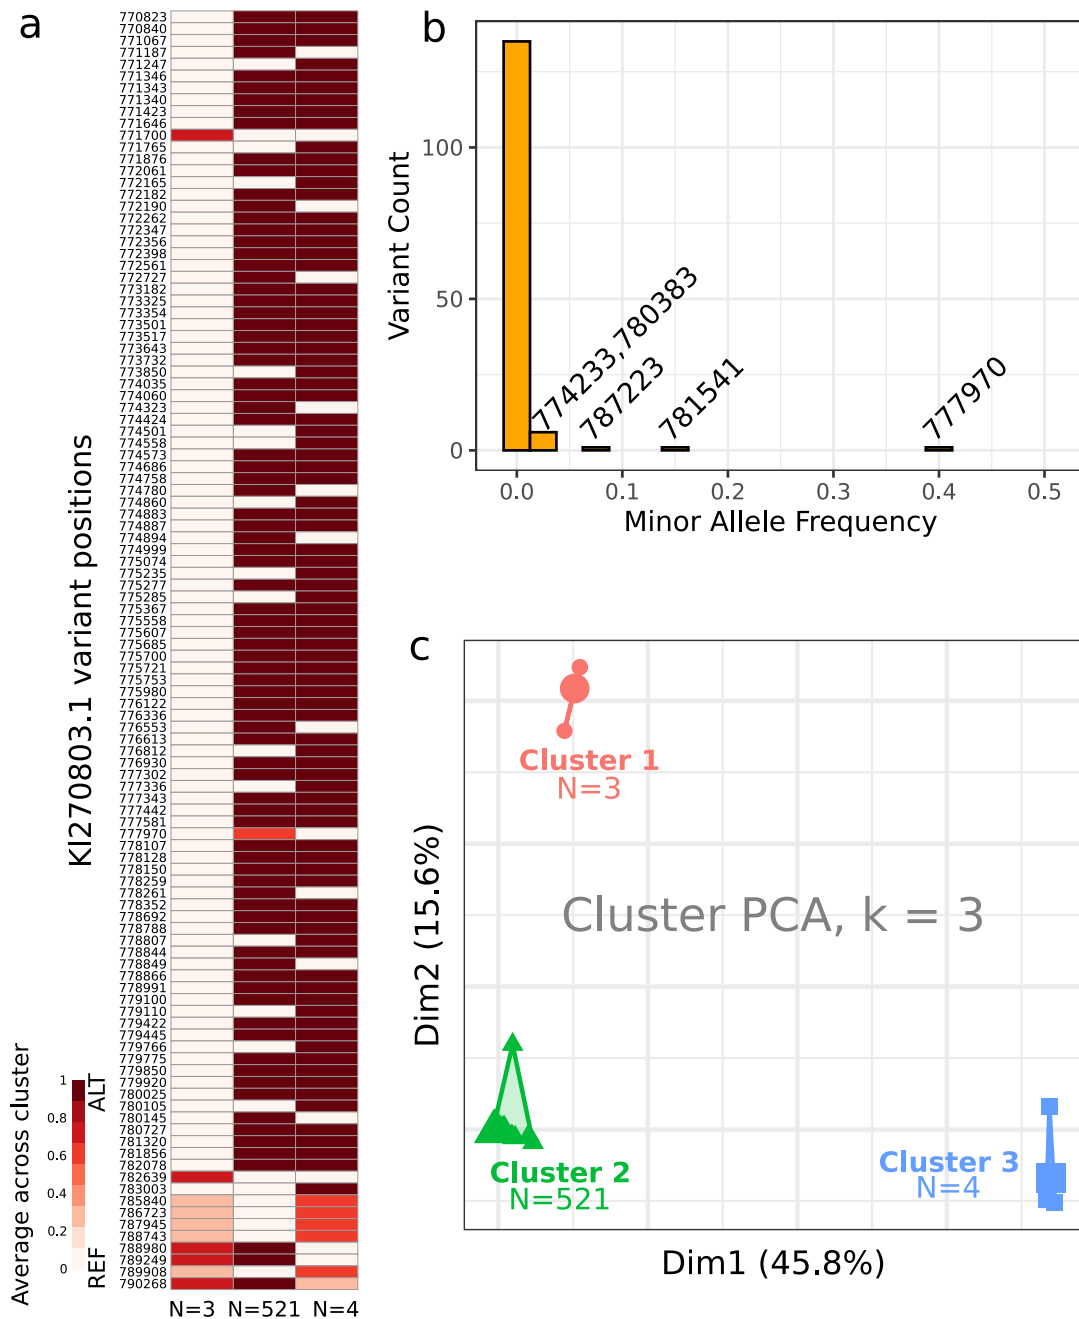

**Figure S 1. Clustering non-deleted haplotypes.** 144 variants called within the deletion boundary (KI270803.1:770437-790564) were used to cluster 528 non-deleted haplotypes into three groups via k-means clustering. **a** 108 informative variants are plotted; each row is a variant position and columns represents the average haplotype within each cluster. A light cell implies a reference base and a dark cell implies alternative; reference sequence KI270803.1 appears to be most similar to Cluster 3. **b** Distribution of allele frequency for variants in the largest non-deleted haplotype cluster. Allele frequency was calculated for 521 haplotypes. Little variation is observed in this haplotype group, only five variants had minor allele frequency >2.5%. KI270803.1 coordinate positions of these five variants are denoted. **c** The first two principal components are plotted with three distinct clusters. The smaller two clusters (cluster 1, n=3; cluster 3, n=4) correspond to six individuals with African ancestry.

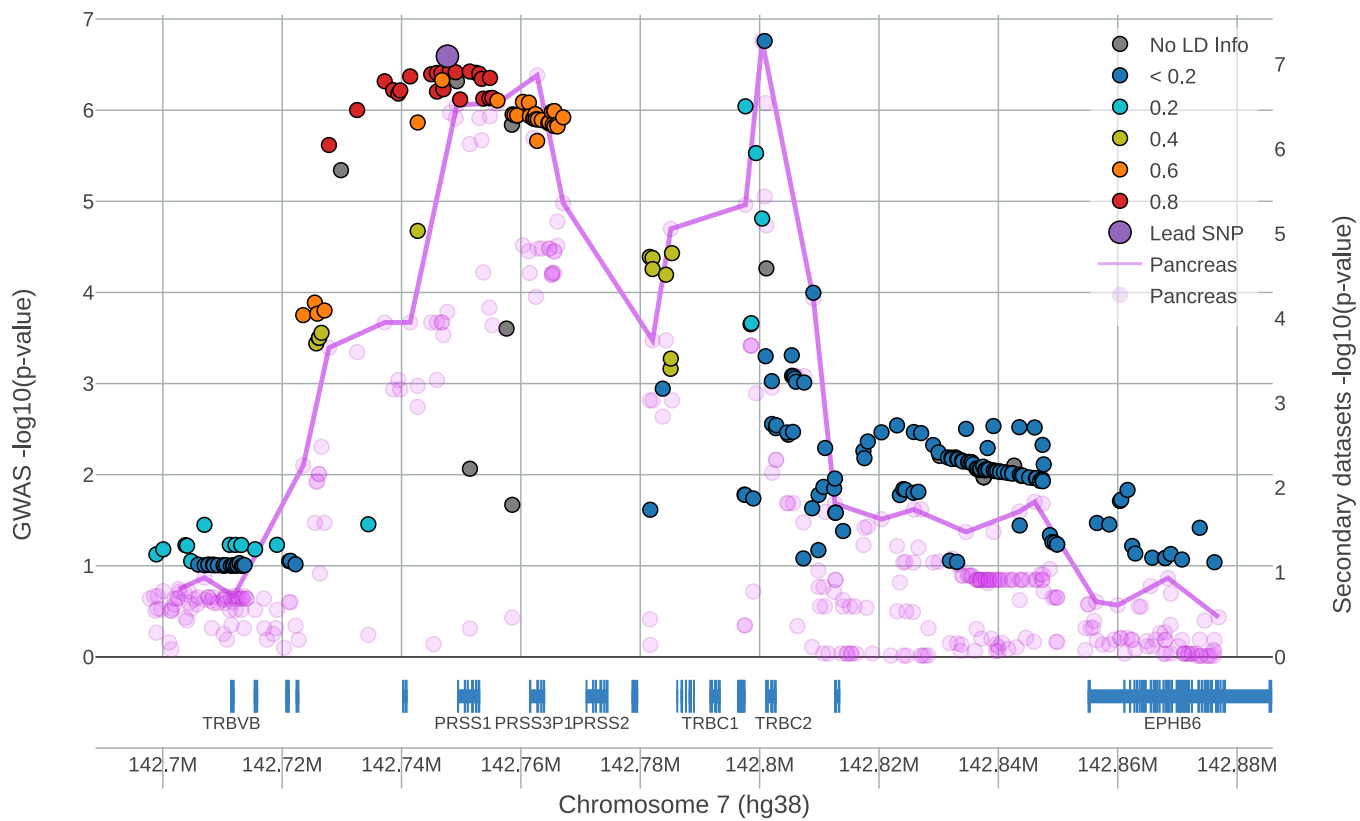

**Figure S 2. Colocalization of GWAS and eQTL SNPs.** Colocalization of meconium ileus GWAS summary statistics and GTEx v8 (1) pancrease *PRSS2* eQTLs using LocusFocus (2) GWAS summary statistics from (3) lifted to GRCh38. Linkage is shown with respect to rs3757377. Purple line follows the most significant pancrease eQTL in a sliding window. Simple sum colocalization  $p$ -value= $7.1e-8$ .

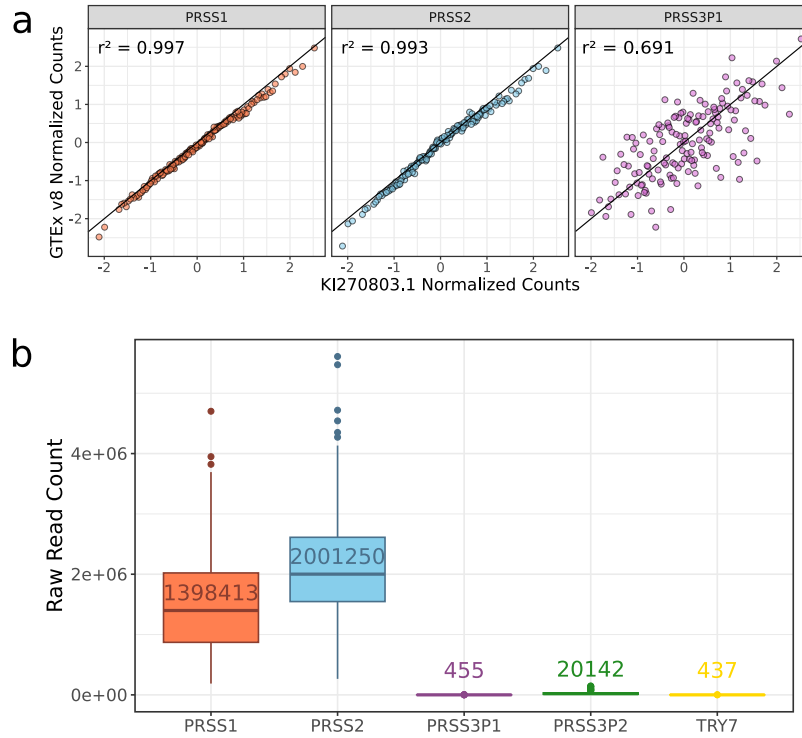

**Figure S3. GTEx v8 read counts using difference reference genomes.** GTEx pancreas RNA-seq samples were aligned to a custom reference that replaces the sequence content from GRCh38 chr7 with KI270803.1. **a** Normalized read counts were computed from alignments to this reference (n=152) and compared to GTEx v8 normalized counts that were produced from alignments against GRCh38. For *PRSS1* and *PRSS2*, there is a strong concordance ( $r^2$  correlation >0.99) between normalized read counts from KI270803.1 and GRCh38. In contrast, *PRSS3P1* displays much less concordance and alignments to *PRSS3P1* are susceptible to the reference sequence used. This is because *PRSS3P1* is not expressed and therefore only receives spurious alignments. Overall, the presence of the extra 20 kb sequence does not significantly shift the normalized gene expression counts for *PRSS1* or *PRSS2* when compared with GTEx v8 counts. **b** Unnormalized RNA-seq read counts to five trypsinogen paralogs after alignment to KI270803.1. Median value for each gene is annotated. *PRSS3P1* and *TRY7* are not expressed but receive a small number of spurious alignments (<1% of total from all five paralogs).

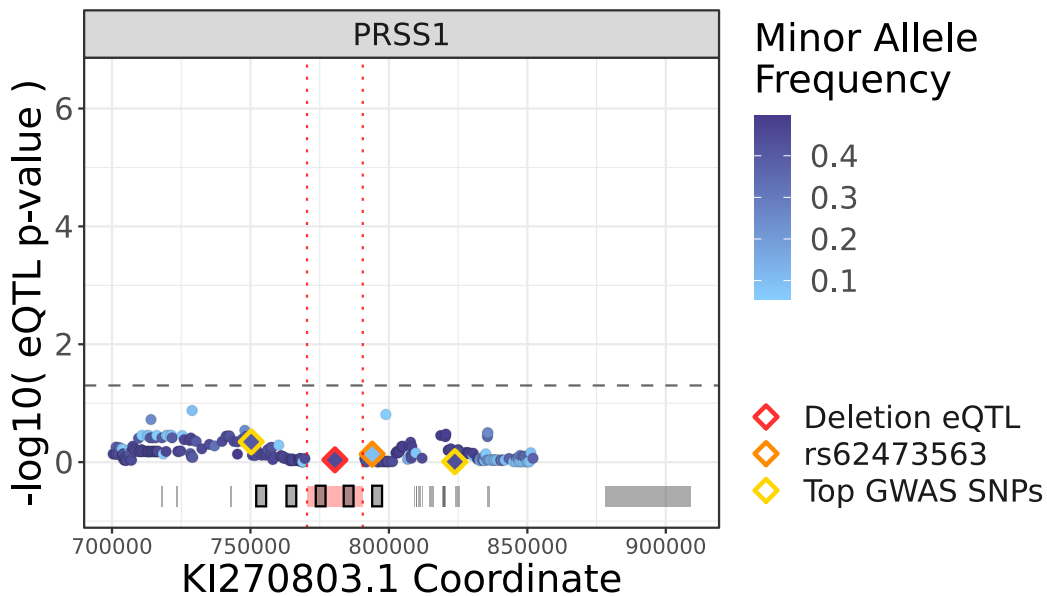

**Figure S4. *PRSS1* pancreas eQTLs.** Recalculating *PRSS1* eQTLs from 252 GTEx samples after lifting variants to chr7 alternative contig KI270803.1. No variant passes the significance threshold  $p < 0.05$  (dotted line).

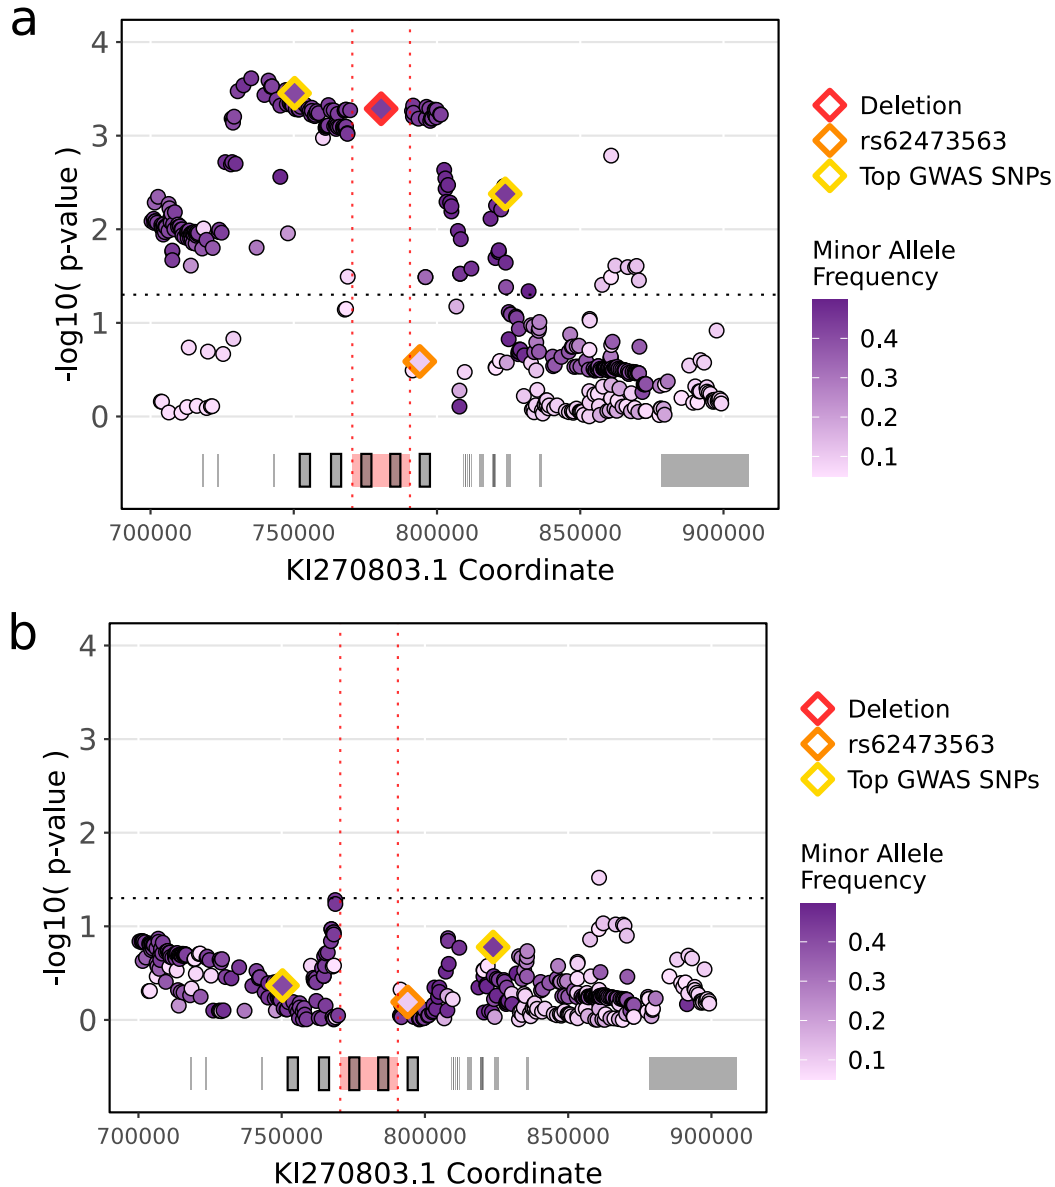

**Figure S 5. *PRSS1* pancreas eQTLs.** Association to meconium ileus using 10XG-imputed array data. Genotype data for 2635 CCGMS individuals with European ancestry lifted over to KI270803.1. Both the phase and the deletion polymorphism imputed using the 10XG CCGMS samples as a reference panel. Association between SNPs with imputed deletion polymorphism and meconium ileus is plotted. **a** Haplotype that includes the deletion polymorphism (red diamond) demonstrates significant association with an additive increased risk of disease ( $\beta=0.29$ ,  $p=5.2e-4$ ). top GWAS-identified variants (yellow diamond) are replicated as significant. **b** Recalculating association with the deletion genotype included as a covariate, association signal is attenuated. Imputation quality for rs62473563 is poor. A masked VCF was created by filtering the 10XG sequencing calls to match the information available in each genotyping array. The masked VCF was imputed and compared back to the original sequencing calls. This process reveals that more imputation errors are made than correct calls for rs62473563. This problem is present for the 610Q and 660W array platforms which account for 74% of the samples.

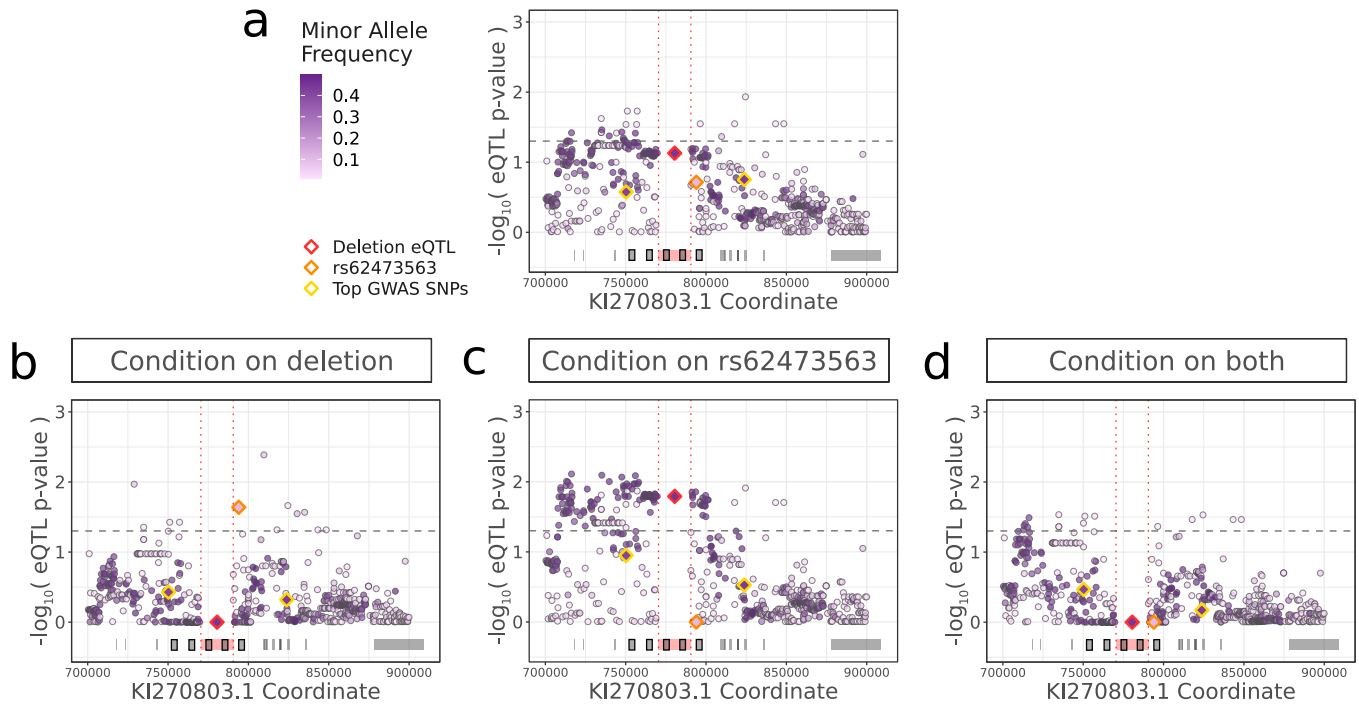

**Figure S 6. Conditional association analysis for meconium ileus risk using all available samples.** **a** Association with meconium ileus was similarly performed for 337 10XG samples where yellow diamonds are the top GWAS SNP reported in (3), red diamond is the deletion polymorphism and orange diamond represents rs62473563. **b** Meconium ileus risk conditioning on deletion polymorphism. **c** Meconium ileus risk conditioning on rs62473563. **d** Meconium ileus risk conditioning on both rs62473563 and deletion polymorphism.

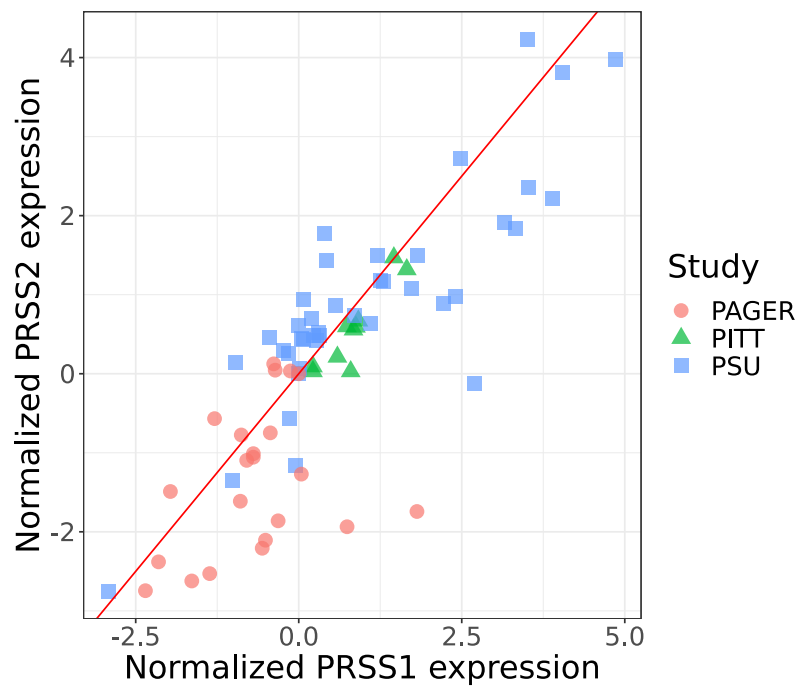

**Figure S 7. *PRSS1* and *PRSS2* expression from 69 pancreas tissue samples.** Raw data sourced from (4) which uses data from three studies (red circles are from "PAGER" study, green triangle from "PITT" and blue square from "PSU" study). RNA for *PRSS1* and *PRSS2* was quantified and association was demonstrated between rs1027369 and *PRSS1* expression ( $p=0.01$ ). *PRSS2* expression shows correlation with *PRSS1* expression ( $r^2=0.83$ ) and regression between rs1027369 and *PRSS2* expression is in same direction as *PRSS1* ( $p=0.053$ ).

## Supplementary Tables

| Site Name                                         | Province         | City       | Clinic    | Patients |
|---------------------------------------------------|------------------|------------|-----------|----------|
| The Hospital for Sick Children                    | Ontario          | Toronto    | Pediatric | 190      |
| St. Michael's Hospital                            | Ontario          | Toronto    | Adult     | 61       |
| Children's Hospital of Western Ontario            | Ontario          | London     | Pediatric | 24       |
| Centre de recherche du CHUM                       | Québec           | Montréal   | Adult     | 55       |
| Québec (IUCPQ-UL)                                 | Québec           | Laval      | Adult     | 45       |
| St. Paul's Hospital                               | British Columbia | Vancouver  | Adult     | 52       |
| BC Children's Hospital                            | British Columbia | Vancouver  | Pediatric | 23       |
| Foothills Medical Centre                          | Alberta          | Calgary    | Adult     | 9        |
| Alberta Children's Hospital                       | Alberta          | Calgary    | Pediatric | 2        |
| University of Alberta Hospital                    | Alberta          | Edmonton   | Adult     | 2        |
| IWK Health Centre                                 | Nova Scotia      | Halifax    | Pediatric | 10       |
| Royal University Hospital                         | Saskatchewan     | Saskatoon  | Pediatric | 2        |
| Janeway Children's Health & Rehabilitation Centre | Newfoundland     | St. John's | Pediatric | 2        |

**Table S 1.** Recruitment sites of the Canadian participants with cystic fibrosis. Participants were recruited into the study from 13 sites spanning seven Canadian provinces.

| Metric                          | MagAttract mean<br>( <i>min-max</i> ) | Other methods mean<br>( <i>min-max</i> ) | NA12878 | Source      |
|---------------------------------|---------------------------------------|------------------------------------------|---------|-------------|
| Linked-reads per molecule       | 29.5<br>(15.0-115.0)                  | 14.9<br>(9.0-25.0)                       | 45.0    | Long Ranger |
| 10XG gems detected (million)    | 1.6<br>(1.3-1.8)                      | 1.7<br>(1.4-1.8)                         | 1.6     | Long Ranger |
| Mean DNA per gem (kb)           | 562.6<br>(173.8-726.9)                | 423.2<br>(321.8-535.6)                   | 414.5   | Long Ranger |
| Mean molecule length (kb)       | 58.7<br>(32.6-95.4)                   | 18.3<br>(11.0-28.6)                      | 73.4    | Long Ranger |
| Total number of reads (million) | 734.1<br>(631.4-1272.0)               | 890.8<br>(743.5-1126.0)                  | 695.4   | Long Ranger |
| Mapped reads (%)                | 96.1<br>(92.8-98.0)                   | 94.7<br>(92.6-96.2)                      | 96.1    | Long Ranger |
| Mean coverage                   | 31.3<br>(26.4-55.8)                   | 37.0<br>(31.4-47.6)                      | 29.7    | Long Ranger |
| Zero coverage (%)               | 0.54<br>(0.15-0.98)                   | 0.49<br>(0.16-0.92)                      | 0.82    | Long Ranger |
| Median insert size (bp)         | 369.4<br>(298.0-452.0)                | 388.9<br>(375.0-414.0)                   | 325.0   | Long Ranger |
| PCR duplication (%)             | 3.1<br>(1.9-6.4)                      | 5.0<br>(3.4-7.1)                         | 2.3     | Long Ranger |
| Genes >100kb phased (%)         | 98.8<br>(95.8-99.5)                   | 91.3<br>(81.1-96.5)                      | 98.9    | Long Ranger |
| Phased blocks                   | 2445<br>(927-5958)                    | 17072<br>(8530-30415)                    | 2237    | WhatsHap    |
| Longest phase block (Mb)        | 21.4<br>(7.5-87.8)                    | 4.1<br>(1.6-6.9)                         | 33.6    | Long Ranger |
| Phase block N50 (Mb)            | 4.4<br>(1.3-19.3)                     | 0.5<br>(0.2-0.9)                         | 5.0     | Long Ranger |
| Mean variants per block         | 1426.3<br>(522.3-4415.7)              | 215.3<br>(93.3-358.1)                    | 1522.8  | WhatsHap    |
| Variants called (millions)      | 5.7<br>(5.3-7.3)                      | 5.5<br>(5.4-5.6)                         | 6.0     | WhatsHap    |
| Heterozygous SNPs (millions)    | 2.9<br>(2.5-3.9)                      | 2.8<br>(2.7-2.9)                         | 3.0     | WhatsHap    |
| Phased SNPs (millions)          | 2.5<br>(2.2-3.5)                      | 2.5<br>(2.2-3.5)                         | 2.6     | WhatsHap    |
| Short deletion calls            | 4659<br>(4172-5319)                   | 4817<br>(4624-5103)                      | 4528    | Long Ranger |

**Table S 2.** Genome-wide metrics for 10XG phasing. Comparison of metrics between CCGMS samples extracted using MagAttract (n=463), other DNA extraction methods (n=14) and publicly available sample NA12878 (5). Values were calculated and reported by either WhatsHap (6) or Long Ranger (7) as specified



| Gene Symbol | Variant ID              | rsID         | p-value  | NES  |
|-------------|-------------------------|--------------|----------|------|
| PRSS2       | chr7_142770582_A_G_b38  | rs2855983    | 8.80E-08 | 0.29 |
| PRSS2       | chr7_142776167_A_AT_b38 | rs1426115328 | 9.20E-08 | 0.29 |
| PRSS2       | chr7_142776421_A_T_b38  | rs2014445    | 9.20E-08 | 0.29 |
| PRSS2       | chr7_142778093_C_A_b38  | rs2734218    | 9.20E-08 | 0.29 |
| PRSS2       | chr7_142778351_G_A_b38  | rs2734219    | 9.20E-08 | 0.29 |
| PRSS2       | chr7_142762725_G_A_b38  | rs3752404    | 1.40E-07 | 0.29 |
| PRSS2       | chr7_142800425_T_C_b38  | rs1800907    | 5.30E-08 | 0.28 |
| PRSS2       | chr7_142756070_C_A_b38  | rs2855972    | 2.90E-07 | 0.27 |
| PRSS2       | chr7_142748102_A_G_b38  | rs9969188    | 3.70E-07 | 0.27 |
| PRSS2       | chr7_142762093_C_G_b38  | rs12534595   | 7.40E-07 | 0.27 |
| PRSS2       | chr7_142753427_T_C_b38  | rs10231771   | 7.90E-07 | 0.27 |
| PRSS2       | chr7_142779536_A_G_b38  | rs2734221    | 8.50E-07 | 0.27 |
| PRSS2       | chr7_142775307_A_G_b38  | rs151340166  | 1.00E-06 | 0.27 |
| PRSS2       | chr7_142749281_A_C_b38  | rs4726576    | 3.00E-07 | 0.26 |
| PRSS2       | chr7_142754822_C_G_b38  | rs4726577    | 4.10E-07 | 0.26 |
| PRSS2       | chr7_142749077_T_C_b38  | rs10273639   | 4.30E-07 | 0.26 |
| PRSS2       | chr7_142753014_T_C_b38  | rs6667       | 4.30E-07 | 0.26 |
| PRSS2       | chr7_142751439_C_T_b38  | rs3857776    | 8.80E-07 | 0.26 |
| PRSS2       | chr7_142776921_T_C_b38  | rs13242405   | 3.10E-06 | 0.26 |
| PRSS2       | chr7_142801003_T_C_b38  | rs1799887    | 2.90E-07 | 0.25 |
| PRSS2       | chr7_142796922_C_G_b38  | rs2071361    | 1.90E-06 | 0.25 |
| PRSS2       | chr7_142795717_A_G_b38  | rs6961499    | 2.90E-06 | 0.25 |
| PRSS2       | chr7_142767091_C_T_b38  | rs10952532   | 4.40E-06 | 0.25 |
| PRSS2       | chr7_142797624_G_A_b38  | rs56352733   | 4.60E-06 | 0.25 |
| PRSS2       | chr7_142773135_A_G_b38  | rs2075544    | 4.70E-06 | 0.25 |
| PRSS2       | chr7_142789018_T_C_b38  | rs2367487    | 7.10E-06 | 0.25 |
| PRSS2       | chr7_142766134_C_T_b38  | rs2886990    | 7.20E-06 | 0.25 |
| PRSS2       | chr7_142785121_T_C_b38  | rs3114486    | 8.80E-06 | 0.25 |
| PRSS2       | chr7_142768299_C_G_b38  | rs2734213    | 1.00E-05 | 0.25 |
| PRSS2       | chr7_142774654_A_C_b38  | rs2855985    | 9.30E-06 | 0.24 |
| PRSS2       | chr7_142775024_G_A_b38  | rs151339640  | 9.30E-06 | 0.24 |
| PRSS2       | chr7_142776778_A_C_b38  | rs2734217    | 9.30E-06 | 0.24 |
| PRSS2       | chr7_142766103_G_A_b38  | rs2367484    | 1.40E-05 | 0.24 |
| PRSS2       | chr7_142762842_G_C_b38  | rs10952531   | 1.50E-05 | 0.24 |
| PRSS2       | chr7_142763495_G_A_b38  | rs56225909   | 1.50E-05 | 0.24 |
| PRSS2       | chr7_142764751_T_A_b38  | rs4726582    | 1.50E-05 | 0.24 |
| PRSS2       | chr7_142764755_T_A_b38  | rs4726583    | 1.50E-05 | 0.24 |
| PRSS2       | chr7_142800839_T_C_b38  | rs1799886    | 3.70E-06 | 0.23 |
| PRSS2       | chr7_142753685_G_C_b38  | rs1811090    | 1.20E-05 | 0.23 |
| PRSS2       | chr7_142760340_G_C_b38  | rs1969595    | 1.40E-05 | 0.23 |
| PRSS2       | chr7_142761342_A_G_b38  | rs13225332   | 1.60E-05 | 0.23 |
| PRSS2       | chr7_142765588_C_G_b38  | rs13229600   | 1.60E-05 | 0.23 |
| PRSS2       | chr7_142765617_G_A_b38  | rs13228878   | 1.60E-05 | 0.23 |
| PRSS2       | chr7_142768623_A_C_b38  | rs2855981    | 2.20E-05 | 0.23 |
| PRSS2       | chr7_142761494_C_T_b38  | rs11765409   | 2.90E-05 | 0.23 |
| PRSS2       | chr7_142765247_C_T_b38  | rs34500324   | 2.90E-05 | 0.23 |
| PRSS2       | chr7_142765339_C_T_b38  | rs4726588    | 2.90E-05 | 0.23 |
| PRSS2       | chr7_142765565_A_AT_b38 | rs71522195   | 2.90E-05 | 0.23 |
| PRSS2       | chr7_142765615_C_T_b38  | rs13229701   | 2.90E-05 | 0.23 |
| PRSS2       | chr7_142762515_T_C_b38  | rs11770572   | 5.60E-05 | 0.23 |
| PRSS2       | chr7_142801129_G_A_b38  | rs1042955    | 8.00E-06 | 0.22 |
| PRSS2       | chr7_142765189_G_T_b38  | rs4726585    | 3.10E-05 | 0.22 |
| PRSS2       | chr7_142765191_A_T_b38  | rs4726586    | 3.10E-05 | 0.22 |
| PRSS2       | chr7_142779935_C_T_b38  | rs2855990    | 6.00E-05 | 0.22 |
| PRSS2       | chr7_142780026_T_C_b38  | rs2734222    | 6.00E-05 | 0.22 |
| PRSS2       | chr7_142753697_A_G_b38  | rs1811091    | 2.90E-05 | 0.21 |
| PRSS2       | chr7_142746804_A_C_b38  | rs11761222   | 7.30E-05 | 0.21 |
| PRSS2       | chr7_142754721_A_G_b38  | rs1985888    | 7.50E-05 | 0.21 |
| PRSS2       | chr7_142809001_T_C_b38  | rs762691     | 5.80E-05 | 0.2  |
| PRSS2       | chr7_142747676_A_G_b38  | rs3757378    | 8.40E-05 | 0.2  |
| PRSS2       | chr7_142747687_T_C_b38  | rs3757377    | 8.40E-05 | 0.2  |

**Table S 3.** Significant pancreas eQTLs for *PRSS2* reported by GTEx v8 (1). NES=Normalized effect size

## References

1. The GTEx Consortium. The gtex consortium atlas of genetic regulatory effects across human tissues. *Science*, 369:1318–1330, 2020.
2. Naim Panjwani, Fan Wang, Scott Mastromatteo, Allen Bao, Cheng Wang, Gengming He, Jiafen Gong, Johanna M. Rommens, Lei Sun, and Lisa J. Strug. Locusfocus: Web-based colocalization for the annotation and functional follow-up of gwas. *PLOS Computational Biology*, 16:1–8, 2020.
3. Jiafen Gong, Fan Wang, Bowei Xiao, Naim Panjwani, Fan Lin, Katherine Keenan, Julie Avolio, Mohsen Esmaeili, Lin Zhang, Gengming He, David Soave, Scott Mastromatteo, Zeynep Baskurt, Sangook Kim, Wanda K. O’Neal, Deepika Polineni, Scott M. Blackman, Harriet Corvol, Garry R. Cutting, Mitchell Drumm, Michael R. Knowles, Johanna M. Rommens, Lei Sun, and Lisa J. Strug. Genetic association and transcriptome integration identify contributing genes and tissues at cystic fibrosis modifier loci. *PLOS Genetics*, 15, 2019.
4. David C. Whitcomb, Jessica LaRusch, Alyssa M. Krasinskas, Lambertus Klei, Jill P. Smith, Randall E. Brand, John P. Neoptolemos, Markus M. Lerch, Matt Tector, Bimaljit S. Sandhu, Nalini M. Guda, Lidiya Orlichenko, Samer Alkaade, Stephen T. Amann, Michelle A. Anderson, John Baillie, Peter A. Banks, Darwin Conwell, Gregory A. Coté, Peter B. Cotton, James DiSario, Lindsay A. Farrer, Chris E. Forsmark, Marianne Johnstone, Timothy B. Gardner, Andres Gelrud, William Greenhalf, Jonathan L. Haines, Douglas J. Hartman, Robert A. Hawes, Christopher Lawrence, Michele Lewis, Julia Mayerle, Richard Mayeux, Nadine M. Melhem, Mary E. Money, Thiruvengadam Muniraj, Georgios I. Papachristou, Margaret A. Pericak-Vance, Joseph Romagnuolo, Gerard D. Schellenberg, Stuart Sherman, Peter Simon, Vijay P. Singh, Adam Slivka, Donna Stolz, Robert Sutton, Frank Ulrich Weiss, C. Mel Wilcox, Narcis Octavian Zarnescu, Stephen R. Wisniewski, Michael R. O’Connell, Michelle L. Kienholz, Kathryn Roeder, M. Michael Barmada, Dhiraj Yadav, Bernie Devlin, Marilyn S. Albert, Roger L. Albin, Liana G. Apostolova, Steven E. Arnold, Clinton T. Baldwin, Robert Barber, Lisa L. Barnes, Thomas G. Beach, Gary W. Beecham, Duane Beekly, David A. Bennett, Eileen H. Bigio, Thomas D. Bird, Deborah Blacker, Adam Boxer, James R. Burke, Joseph D. Buxbaum, Nigel J. Cairns, Laura B. Cantwell, Chuanhai Cao, Regina M. Carney, Steven L. Carroll, Helena C. Chui, David G. Clark, David H. Cribbs, Elizabeth A. Crocco, Carlos Cruchaga, Charles DeCarli, F. Yesim Demirci, Malcolm Dick, Dennis W. Dickson, Ranjan Duara, Nilufer Ertekin-Taner, Kelley M. Faber, Kenneth B. Fallon, Martin R. Farlow, Steven Ferris, Tatiana M. Foroud, Matthew P. Frosch, Douglas R. Galasko, Mary Ganguli, Marla Gearing, Daniel H. Geschwind, Bernardino Ghetti, John R. Gilbert, Sid Gilman, Jonathan D. Glass, Alison M. Goate, Neill R. Graff-Radford, Robert C. Green, John H. Growdon, Hakon Hakonarson, Kara L. Hamilton-Nelson, Ronald L. Hamilton, Lindy E. Harrell, Elizabeth Head, Lawrence S. Honig, Christine M. Hulette, Bradley T. Hyman, Gregory A. Jicha, Lee Way Jin, Gyungah Jun, M. Ilyas Kamboh, Anna Karydas, Jeffrey A. Kaye, Ronald Kim, Edward H. Koo, Neil W. Kowall, Joel H. Kramer, Patricia Kramer, Walter A. Kukul, Frank M. LaFerla, James J. Lah, James B. Leverenz, Allan I. Levey, Ge Li, Chiao Feng Lin, Andrew P. Lieberman, Oscar L. Lopez, Kathryn L. Lunetta, Constantine G. Lyketsos, Wendy J. MacK, Daniel C. Marson, Eden R. Martin, Frank Martiniuk, Deborah C. Mash, Eliezer Masliah, Ann C. McKee, Marsel Mesulam, Bruce L. Miller, Carol A. Miller, Joshua W. Miller, Thomas J. Montine, John C. Morris, Jill R. Murrel, Adam C. Naj, John M. Olichney, Joseph E. Parisi, Elaine Peskind, Ronald C. Petersen, Aimee Pierce, Wayne W. Poon, Huntington Potter, Joseph F. Quinn, Ashok Raj, Murray Raskind, Eric M. Reiman, Barry Reisberg, Christiane Reitz, John M. Ringman, Erik D. Roberson, Howard J. Rosen, Roger N. Rosenberg, Mary Sano, Andrew J. Saykin, Julie A. Schneider, Lon S. Schneider, William W. Seeley, Amanda G. Smith, Joshua A. Sonnen, Salvatore Spina, Robert A. Stern, Rudolph E. Tanzi, John Q. Trojanowski, Juan C. Troncoso, Debby W. Tsuang, Otto Valladares, Vivianna M. Van Deerlin, Linda J. Van Eldik, Badri N. Vardarajan, Harry V. Vinters, Jean Paul Vonsatte, Li San Wang, Sandra Weintraub, Kathleen A. Welsh-Bohmer, Jennifer Williamson, Randall L. Woltjer, Clinton B. Wright, Steven G. Younkin, Chang En Yu, and Lei Yu. Common genetic variants in the cldn2 and prss1-prss2 loci alter risk for alcohol-related and sporadic pancreatitis. *Nature Genetics*, 44:1349–1354, 2012.
5. Justin M. Zook, Jennifer McDaniel, Nathan D. Olson, Justin M. Wagner, Hemang Parikh, Haynes Heaton, Sean A. Irvine, Len Trigg, Rebecca Truty, Cory Y. McLean, Francisco M. De La Vega, Chunlin Xiao, Stephen Sherry, and Marc Salit. An open resource for accurately benchmarking small variant and reference calls. *Nature Biotechnology*, 37:561–566, 2019.
6. Marcel Martin, Murray Patterson, Shilpa Garg, Sarah O. Fischer, Nadia Pisanti, Gunnar W. Klau, Alexander Schönhuth, and Tobias Marschall. Whatshap: fast and accurate read-based phasing. *bioRxiv*, page 85050, 2016.
7. Patrick Marks, Sarah Garcia, Alvaro Martinez Barrio, Kamila Belhocine, Jorge Bernate, Rajiv Bharadwaj, Keith Bjornson, Claudia Catalanotti, Josh Delaney, Adrian Fehr, Ian T. Fiddes, Brendan Galvin, Haynes Heaton, Jill Herschleb, Christopher Hindson, Esty Holt, Cassandra B. Jabara, Susanna Jett, Nikka Keivanfar, Sofia Kyriazopoulou-Panagiotopoulou, Monkol Lek, Bill Lin, Adam Lowe, Shazia Mahamdallie, Shamoni Maheshwari, Tony Makarewicz, Jamie Marshall, Francesca Meschi, Christopher J. O’Keefe, Heather Ordonez, Pranav Patel, Andrew Price, Ariel Royall, Elise Ruark, Sheila Seal, Michael Schnall-Levin, Preyas Shah, David Stafford, Stephen Williams, Indira Wu, Andrew Wei Xu, Nazneen Rahman, Daniel MacArthur, and Deanna M. Church. Resolving the full spectrum of human genome variation using linked-reads. *Genome Research*, 29:635–645, 2019.
